# Supplementary material
Source: PubMed Central journal article supplement (PMC5822197)
Supplement: jamaneurol-74-668-s001.pdf [file jamaneurol-74-668-s001.pdf]

## Supplementary Online Content

Razaz N, Tedroff K, Villamor E, Cnattingius S. Maternal body mass index in early pregnancy and risk of epilepsy in offspring. *JAMA Neurol*. Published online April 3, 2017. doi:10.1001/jamaneurol.2016.6130

**eTable 1.** ICD-10 Codes for Maternal, Neonatal, and Childhood Diseases

**eTable 2.** Incidence Rates and Hazard Ratios of Epilepsy in Children According to Maternal Characteristics

**eTable 3.** Incidence Rates and Hazard Ratios of Epilepsy According to Maternal and Neonatal Complications

**eTable 4.** Early Pregnancy Body-Mass Index and Rates of Epilepsy in Children Without Cerebral Palsy

This supplementary material has been provided by the authors to give readers additional information about their work.

**eTable 1. ICD-10 Codes for Maternal, Neonatal, and Childhood Diseases.**

| <b>Diseases</b>                                        | <b>ICD-10 codes</b>                                                                                                                                                                                                                                                                                                    |
|--------------------------------------------------------|------------------------------------------------------------------------------------------------------------------------------------------------------------------------------------------------------------------------------------------------------------------------------------------------------------------------|
| <b>Epilepsy*</b>                                       | G40, G41                                                                                                                                                                                                                                                                                                               |
| <b>Maternal complications**</b>                        |                                                                                                                                                                                                                                                                                                                        |
| Pre-gestational hypertension <sup>†</sup>              | I10 to I15, O10 and O11                                                                                                                                                                                                                                                                                                |
| Preeclampsia and eclampsia                             | O14 and O15                                                                                                                                                                                                                                                                                                            |
| Pregestational diabetes                                | E10 to E14, O24.0 to O24.3                                                                                                                                                                                                                                                                                             |
| Gestational diabetes                                   | O24.4                                                                                                                                                                                                                                                                                                                  |
| Maternal infection                                     | A00-B99, G00-G07; I00-I02; I32.0; I33, I38; I40.0; J00-J06; J10-J18; J20-J22; J36; J39.0; J85.1; J86; K35-K37; K57.0; K57.2; K57.4; K57.8; K61; K63.0; K65.0; K65.9; K67; K75.0; K75.1; K80.0; K80.3; K80.4; K81.0; K81.9; K83.0; L00-L03; L05-L08; M00; M01; M86; N10; N12; N15.1; N30; N39.0; N41; N45; N70-N77; O23 |
| Chorioamnionitis                                       | O411, O4110, O411A, O411B, O411C, O411X                                                                                                                                                                                                                                                                                |
| <b>Neonatal complications<sup>‡</sup></b>              |                                                                                                                                                                                                                                                                                                                        |
| Neonatal infections <sup>¶</sup>                       | P77.9, P35 to P39                                                                                                                                                                                                                                                                                                      |
| Asphyxia-related neonatal complications                |                                                                                                                                                                                                                                                                                                                        |
| Meconium aspiration                                    | P24.0                                                                                                                                                                                                                                                                                                                  |
| Hypoxic ischemic encephalopathy and related conditions | P91.0, P91.3 to P91.6, P91.8 to P91.9                                                                                                                                                                                                                                                                                  |
| Convulsions/seizures                                   | P90                                                                                                                                                                                                                                                                                                                    |
| Hypoglycemia                                           | P70                                                                                                                                                                                                                                                                                                                    |
| Jaundice                                               | P55-P59                                                                                                                                                                                                                                                                                                                |
| Respiratory distress                                   | P20, P22, P24-P28                                                                                                                                                                                                                                                                                                      |
| Birth asphyxia                                         | P21                                                                                                                                                                                                                                                                                                                    |
| Birth Trauma                                           | P10-P15                                                                                                                                                                                                                                                                                                                |
| <b>Congenital malformations</b>                        |                                                                                                                                                                                                                                                                                                                        |
| Any malformation                                       | Q00 to Q99, excluding minor malformations as defined by the Swedish National Board of Health and Welfare <sup>‡</sup> : Q17.0, Q17.5, Q18.0, Q18.1, Q25.0, Q27.0, Q31.5, Q32.0, Q52.3, Q53.0 to Q53.9, Q66.5 to Q66.9, Q69.0 to Q69.9, Q70.0 to Q70.9, Q76.0, Q79.9, Q82.5, and Q82.9                                  |
| Chromosomal abnormalities                              | Q90 to Q93, Q95 to Q99                                                                                                                                                                                                                                                                                                 |
| Circulatory system malformations                       | Q20 to Q28, excluding Q25.0 and Q27.0                                                                                                                                                                                                                                                                                  |
| Nervous system malformations                           | Q00 to Q07                                                                                                                                                                                                                                                                                                             |

---

Diseases were defined using the Swedish version of the International classification of Diseases, tenth revision (ICD-10).

\*A case of epilepsy was identified if it met any of the following conditions between 1997 and 2012: A) An occurrence of  $\geq 2$  ICD-10 codes G40 and/or G41 (epilepsy and status epilepticus, respectively) on separate dates; *or* B) An occurrence of  $\geq 1$  ICD-10 code R56 (convulsions not elsewhere classified) *and*  $\geq 1$  ICD-10 codes G40 and/or G41 on separate dates; diagnosis of R56 had to precede that of G40 and/or G41.<sup>25,26</sup>

\*\* Maternal diseases, other than maternal epilepsy, were identified from ICD-10 codes from the Medical Birth Register.

† Definition of pre-gestational hypertension also included self-reported information at the first antenatal visit.

‡ Neonatal diseases were identified from ICD-10 codes from the Medical Birth Register and the National Patient Register.

§ Information on infections was restricted to the first 28 days of life.

¶ ICD-10 codes of minor malformations are available at

<http://www.socialstyrelsen.se/register/halsodataregister/medicinskafodelsregistret/Documents/diagnoser-som-inte-ska-rapporteras.pdf>

**eTable 2. Incidence Rates and Hazard Ratios of Epilepsy in Children According to Maternal Characteristics. Live-born singleton children in Sweden 1997-2011.**

| Characteristic               | Number of children | Child-years of follow-up | Epilepsy |                          | Adjusted hazard ratio (95% CI)* |
|------------------------------|--------------------|--------------------------|----------|--------------------------|---------------------------------|
|                              |                    |                          | n        | Rate per 10,000 child-yr |                                 |
| Total                        | 1,421,551          | 11,176,386               | 7592     | 6.79                     |                                 |
| Maternal age (years)         |                    |                          |          |                          |                                 |
| ≤19                          | 24,611             | 200166                   | 128      | 6.39                     | 0.77 (0.63 to 0.93)             |
| 20-24                        | 18357              | 1,519965                 | 1101     | 7.24                     | 1.00                            |
| 25-29                        | 440836             | 3,617805                 | 2441     | 6.75                     | 0.97 (0.90 to 1.05)             |
| 30-34                        | 491274             | 3820511                  | 2502     | 6.55                     | 0.96 (0.88 to 1.04)             |
| ≥35                          | 276473             | 2,017939                 | 1420     | 7.04                     | 0.98 (0.89 to 1.07)             |
| P, trend†                    |                    |                          |          |                          | 0.82                            |
| Country of birth             |                    |                          |          |                          |                                 |
| Nordic                       | 1,167513           | 9391891                  | 6434     | 6.85                     | 1.00                            |
| Non-Nordic                   | 253267             | 1775760                  | 1154     | 6.50                     | 1.15 (1.07 to 1.24)             |
| Data missing                 | 771                | 8735                     | 4        | 4.58                     |                                 |
| P†                           |                    |                          |          |                          | <0.001                          |
| Education (years)            |                    |                          |          |                          |                                 |
| ≤9                           | 136691             | 1037194                  | 845      | 8.15                     | 1.28 (1.17 to 1.41)             |
| 10-11                        | 222905             | 2143013                  | 1605     | 7.49                     | 1.25 (1.16 to 1.34)             |
| 12                           | 365852             | 2769496                  | 1851     | 6.68                     | 1.06 (0.99 to 1.14)             |
| 13-14                        | 197955             | 1662957                  | 1080     | 6.49                     | 1.07 (1.00 to 1.16)             |
| ≥15                          | 479194             | 3496421                  | 2153     | 6.18                     | 1.00                            |
| Data missing                 | 18954              | 77305                    | 58       | 7.50                     |                                 |
| P, trend†                    |                    |                          |          |                          | <0.001                          |
| Mother cohabits with partner |                    |                          |          |                          |                                 |
| Yes                          | 1,274479           | 10003942                 | 6671     | 6.67                     | 1.00                            |
| No                           | 74,661             | 548319                   | 495      | 9.03                     | 1.27 (1.15 to 1.40)             |
| Data missing                 | 72,411             | 624125                   | 426      | 6.83                     |                                 |
| P                            |                    |                          |          |                          | <0.001                          |
| Parity                       |                    |                          |          |                          |                                 |
| 1                            | 627772             | 4876638                  | 3363     | 6.90                     | 1.00                            |
| 2                            | 523127             | 4123730                  | 2692     | 6.53                     | 0.95 (0.90 to 1.01)             |

|                      |         |         |      |      |                     |
|----------------------|---------|---------|------|------|---------------------|
| 3                    | 190068  | 1527441 | 1018 | 6.66 | 0.96 (0.89 to 1.04) |
| ≥4                   | 80584   | 648577  | 519  | 8.00 | 1.11 (1.00 to 1.24) |
| P, trend             |         |         |      |      | 0.66                |
| Maternal height (cm) |         |         |      |      |                     |
| ≤159                 | 184470  | 1423080 | 998  | 7.01 | 1.02 (0.94 to 1.10) |
| 160-164              | 357202  | 2811783 | 1925 | 6.84 | 1.02 (0.95 to 1.09) |
| 165-169              | 409787  | 3241051 | 2191 | 6.79 | 0.98 (0.92 to 1.04) |
| ≥170                 | 444300  | 3486784 | 2310 | 6.63 | 1.00                |
| Data missing         | 25792   | 213689  | 169  | 7.91 |                     |
| P, trend             |         |         |      |      | 0.27                |
| Year of delivery     |         |         |      |      |                     |
| 1997-1999            | 248949  | 3495773 | 2101 | 6.01 | 0.94 (0.88 to 0.99) |
| 2000-2004            | 541273  | 4575776 | 3173 | 6.93 | 1.00                |
| 2005-2008            | 400694  | 2331142 | 1706 | 7.32 | 1.01 (0.95 to 1.08) |
| 2009-2011            | 320635  | 773695  | 612  | 7.91 | 0.89 (0.81 to 0.98) |
| P                    |         |         |      |      | 0.80                |
| Smoking              |         |         |      |      |                     |
| No                   | 1220555 | 9406877 | 6253 | 6.65 | 1.00                |
| Yes                  | 133622  | 1188011 | 927  | 7.80 | 1.07 (0.99 to 1.16) |
| Data missing         | 67374   | 581498  | 412  | 7.09 |                     |
| P                    |         |         |      |      | 0.08                |

---

## Footnotes to eTable 2

\*Hazard ratios and 95% confidence intervals from Cox proportional hazards models with robust estimates of variance. Covariates included adjusted for maternal age, country of origin, education level, cohabitation with a partner, parity, height, smoking during pregnancy, maternal epilepsy and year of delivery. N denotes sample size for complete case analyses including only women with non-missing values in all covariates.

Complete case analyses including 6422 cases among 1,228,641 children.

† Wald test when a variable representing ordinal categories of the predictor was introduced into the regression model as a continuous covariate.

**eTable 3. Incidence Rates and Hazard Ratios of Epilepsy According to Maternal and Neonatal Complications. Live-born singleton children born at term in Sweden 1997-2011.**

| Characteristic                                          | Epilepsy |                             | Unadjusted hazard ratio (95% CI)* | Adjusted hazard ratio (95% CI)** |
|---------------------------------------------------------|----------|-----------------------------|-----------------------------------|----------------------------------|
|                                                         | n        | Rate per 10,000 child-years |                                   |                                  |
| <b>Maternal diseases and pregnancy complications</b>    |          |                             |                                   |                                  |
| Maternal epilepsy                                       |          |                             |                                   |                                  |
| No                                                      | 6720     | 6.36                        | 1.00                              | 1.00                             |
| Yes                                                     | 82       | 28.2                        | 4.30 (3.44 to 5.38)               | 4.21 (3.35 to 5.30)              |
| P†                                                      |          |                             | <0.001                            | <0.001                           |
| Diabetic disease                                        |          |                             |                                   |                                  |
| No                                                      | 6700     | 6.41                        | 1.00                              | 1.00                             |
| Gestational diabetes                                    | 71       | 7.66                        | 1.18 (0.94 to 1.50)               | 1.25 (0.98 to 1.58)              |
| Pregestational diabetes                                 | 31       | 8.24                        | 1.28 (0.90 to 1.82)               | 1.28 (0.88 to 1.85)              |
| P                                                       |          |                             | 0.14                              | 0.09                             |
| Hypertensive disease                                    |          |                             |                                   |                                  |
| No                                                      | 6586     | 6.40                        | 1.00                              | 1.00                             |
| Pregestational hypertension                             | 31       | 5.97                        | 0.91 (0.64 to 1.30)               | 0.86 (0.59 to 1.25)              |
| Preeclampsia                                            | 185      | 7.49                        | 1.17 (1.01 to 1.36)               | 1.11 (0.95 to 1.30)              |
| P                                                       |          |                             | 0.09                              | 0.31                             |
| Chorioamnionitis                                        |          |                             |                                   |                                  |
| No                                                      | 6793     | 6.42                        | 1.00                              | 1.00                             |
| Yes                                                     | 9        | 7.25                        | 1.30 (0.59 to 2.16)               | 1.19 (0.62 to 2.29)              |
| P                                                       |          |                             | 0.71                              | 0.60                             |
| Maternal infections                                     |          |                             |                                   |                                  |
| No                                                      | 6752     | 6.41                        | 1.00                              | 1.00                             |
| Yes                                                     | 50       | 8.33                        | 1.30 (0.98 to 1.71)               | 1.30 (0.98 to 1.74)              |
| P                                                       |          |                             | 0.07                              | 0.07                             |
| <b>Birth characteristics and neonatal complications</b> |          |                             |                                   |                                  |
| Mode of delivery                                        |          |                             |                                   |                                  |
| Vaginal non-instrumental                                | 4995     | 6.01                        | 1.00                              | 1.00                             |
| Vaginal instrumental                                    | 547      | 6.72                        | 1.11 (1.02 to 1.22)               | 1.11 (1.01 to 1.22)              |
| Elective cesarean section                               | 563      | 8.23                        | 1.35 (1.40 to 1.48)               | 1.33 (1.21 to 1.46)              |
| Emergency cesarean section                              | 644      | 8.81                        | 1.45 (1.34 to 1.58)               | 1.43 (1.31 to 1.56)              |
| P, trend†                                               |          |                             | <0.001                            | <0.001                           |
| Newborn's sex                                           |          |                             |                                   |                                  |
| Male                                                    | 3626     | 6.67                        | 1.00                              | 1.00                             |
| Female                                                  | 3176     | 6.16                        | 0.92 (0.88 to 0.97)               | 0.92 (0.87 to 0.96)              |
| P                                                       |          |                             | 0.001                             | 0.0005                           |

| Characteristic                                         | Epilepsy |                             | Unadjusted hazard ratio<br>(95% CI)* | Adjusted hazard ratio<br>(95% CI)** |
|--------------------------------------------------------|----------|-----------------------------|--------------------------------------|-------------------------------------|
|                                                        | n        | Rate per 10,000 child-years |                                      |                                     |
| Birth weight for gestational age (percentiles)         |          |                             |                                      |                                     |
| <3                                                     | 210      | 15.7                        | 2.55 (2.22 to 2.93)                  | 2.46 (2.13 to 2.58)                 |
| 3 to <10                                               | 399      | 8.38                        | 1.36 (1.22 to 1.50)                  | 1.25 (1.12 to 1.40)                 |
| 10 to 90                                               | 5327     | 6.17                        | 1.00                                 | 1.00                                |
| >90 to 97                                              | 572      | 6.01                        | 0.98 (0.90 to 1.06)                  | 0.99 (0.91 to 1.08)                 |
| >97                                                    | 294      | 7.36                        | 1.20 (1.06 to 1.35)                  | 1.17 (1.03 to 1.32)                 |
| P, trend                                               |          |                             | <0.001                               | <0.001                              |
| Birth Trauma                                           |          |                             |                                      |                                     |
| No                                                     | 6620     | 6.38                        | 1.00                                 | 1.00                                |
| Yes                                                    | 182      | 8.44                        | 1.34 (1.16 to 1.55)                  | 1.28 (1.10 to 1.50)                 |
| P                                                      |          |                             | <0.001                               | 0.002                               |
| Congenital malformations                               |          |                             |                                      |                                     |
| Any malformations                                      |          |                             |                                      |                                     |
| No                                                     | 5442     | 5.44                        | 1.00                                 | 1.00                                |
| Yes                                                    | 1360     | 23.0                        | 4.23 (3.98 to 4.49)                  | 4.18 (3.92 to 4.44)                 |
| P                                                      |          |                             | <0.001                               | <0.001                              |
| Chromosomal abnormalities                              |          |                             |                                      |                                     |
| No                                                     | 6528     | 6.18                        | 1.00                                 | 1.00                                |
| Yes                                                    | 2941     | 124.7                       | 20.1 (17.1 to 22.8)                  | 20.2 (17.8 to 23.1)                 |
| P                                                      |          |                             | <0.001                               | <0.001                              |
| Circulatory malformations                              |          |                             |                                      |                                     |
| No                                                     | 6445     | 6.19                        | 1.00                                 | 1.00                                |
| Yes                                                    | 357      | 20.3                        | 3.24 (2.91 to 3.61)                  | 3.20 (2.86 to 3.58)                 |
| P                                                      |          |                             | <0.001                               | <0.001                              |
| Nervous system malformations                           |          |                             |                                      |                                     |
| No                                                     | 6303     | 5.96                        | 1.00                                 | 1.00                                |
| Yes                                                    | 499      | 298.0                       | 49.8 (45.2 to 54.8)                  | 48.3 (43.6 to 53.5)                 |
| P                                                      |          |                             | <0.001                               | <0.001                              |
| Asphyxia-related neonatal complications                |          |                             |                                      |                                     |
| Meconium aspiration                                    |          |                             |                                      |                                     |
| No                                                     | 6764     | 6.39                        | 1.00                                 | 1.00                                |
| Yes                                                    | 38       | 29.5                        | 4.61 (3.35 to 6.35)                  | 4.16 (2.93 to 5.90)                 |
| P                                                      |          |                             | <0.001                               | <0.001                              |
| Hypoxic ischemic encephalopathy and related conditions |          |                             |                                      |                                     |
| No                                                     | 6568     | 6.21                        | 1.00                                 | 1.00                                |
| Yes                                                    | 234      | 165.8                       | 26.5 (23.2 to 30.3)                  | 26.3 (22.8 to 30.3)                 |
| P                                                      |          |                             | <0.001                               | <0.001                              |



| Characteristic                      | Epilepsy |                             | Unadjusted hazard ratio (95% CI)* | Adjusted hazard ratio (95% CI)** |
|-------------------------------------|----------|-----------------------------|-----------------------------------|----------------------------------|
|                                     | n        | Rate per 10,000 child-years |                                   |                                  |
| Neonatal convulsions/seizures       |          |                             |                                   |                                  |
| No                                  | 6434     | 6.08                        | 1.00                              | 1.00                             |
| Yes                                 | 368      | 228.0                       | 33.4 (33.4 to 41.5)               | 35.7 (31.7 to 40.1)              |
| P                                   |          |                             | <0.001                            | <0.001                           |
| Birth Asphyxia                      |          |                             |                                   |                                  |
| No                                  | 6494     | 6.19                        | 1.00                              | 1.00                             |
| Yes                                 | 308      | 31.8                        | 5.17 (4.61 to 5.80)               | 5.03 (4.45 to 5.69)              |
| P                                   |          |                             | <0.001                            | <0.001                           |
| Apgar score at 5 minutes            |          |                             |                                   |                                  |
| 7 – 10                              | 6434     | 6.16                        | 1.00                              | 1.00                             |
| 4 – 6                               | 186      | 30.2                        | 4.89 (4.22 to 5.66)               | 4.89 (4.20 to 5.70)              |
| 0 – 3                               | 110      | 83.1                        | 13.6 (11.3 to 16.5)               | 13.1 (10.6 to 16.0)              |
| Data missing                        | 72       | 11.5                        |                                   |                                  |
| P, trend                            |          |                             | <0.001                            | <0.001                           |
| <b>Other neonatal complications</b> |          |                             |                                   |                                  |
| Neonatal infections                 |          |                             |                                   |                                  |
| No                                  | 6613     | 6.32                        | 1.00                              | 1.00                             |
| Yes                                 | 189      | 14.2                        | 2.26 (1.95 to 2.62)               | 2.21 (1.90 to 2.58)              |
| P                                   |          |                             | <0.001                            | <0.001                           |
| Neonatal hypoglycemia               |          |                             |                                   |                                  |
| No                                  | 6486     | 6.26                        | 1.00                              | 1.00                             |
| Yes                                 | 316      | 14.2                        | 2.27 (2.02 to 2.54)               | 2.22 (1.97 to 2.50)              |
| P                                   |          |                             | <0.001                            | <0.001                           |
| Neonatal Jaundice                   |          |                             |                                   |                                  |
| No                                  | 6600     | 6.39                        | 1.00                              | 1.00                             |
| Yes                                 | 202      | 7.96                        | 1.24 (1.08 to 1.43)               | 1.23 (1.06 to 1.42)              |
| P                                   |          |                             | 0.003                             | 0.007                            |
| Respiratory distress                |          |                             |                                   |                                  |
| No                                  | 6483     | 6.25                        | 1.00                              | 1.00                             |
| Yes                                 | 319      | 14.9                        | 2.38 (2.13 to 2.66)               | 2.34 (2.08 to 2.63)              |
| P                                   |          |                             | <0.001                            | <0.001                           |

### Footnotes to eTable 3

\* From unadjusted Cox proportional hazards models. Robust estimates of the variance were calculated to account for women who delivered more than once during the study period.

\*\*Hazard ratios and 95% confidence intervals from Cox proportional hazards models with robust estimates of variance. Covariates included adjusted for maternal age, country of origin, education level, cohabitation with a partner, parity, height, smoking during pregnancy, maternal epilepsy and year of delivery.

† Wald test when a variable representing ordinal categories of the predictor was introduced into the regression model as a continuous covariate.

‡ Wald  $\chi^2$  test

**eTable 4. Early Pregnancy Body-Mass Index and Rates of Epilepsy in Children Without Cerebral Palsy.**

| Maternal BMI<br>(kg/m <sup>2</sup> ) | Children without cerebral palsy |                                   |                                           |
|--------------------------------------|---------------------------------|-----------------------------------|-------------------------------------------|
|                                      | n                               | Rate<br>per<br>10,000<br>child-yr | Adjusted HR<br>(95% CI)*<br>n = 1,226,085 |
| Total                                |                                 |                                   |                                           |
| <18.5                                | 134                             | 5.59                              | 1.00 (0.84 to 1.20)                       |
| 18.5 to <25                          | 3387                            | 5.50                              | 1.00                                      |
| 25 to <30                            | 1499                            | 6.18                              | 1.09 (1.02 to 1.16)                       |
| 30 to <35                            | 510                             | 6.90                              | 1.18 (1.07 to 1.30)                       |
| 35 to <40                            | 161                             | 7.51                              | 1.27 (1.08 to 1.50)                       |
| ≥40                                  | 72                              | 10.1                              | 1.68 (1.31 to 2.14)                       |
| Missing                              | 820                             | 6.25                              |                                           |
| P, trend <sup>†</sup>                |                                 |                                   | <0.001                                    |

\*Hazard ratios and 95% confidence intervals from Cox proportional hazards models with robust estimates of variance. Covariates included adjusted for maternal age, country of origin, education level, cohabitation with a partner, parity, height, smoking during pregnancy, maternal epilepsy and year of delivery. N denotes sample size for complete case analyses including only women with non-missing values in all covariates.

<sup>†</sup> Wald test when a variable representing ordinal categories of BMI was introduced into the model as a continuous covariate.
